# Supplementary material for: Uncovering the Unexpected Role of Proteasome Activator PA200 in Regulating Immunoproteasome Expression and Activity
Source: Research Square preprint supplement (doi:10.21203/rs.3.rs-6620945/v1), 2025-05-30
Supplement: Supplementary file 2 [file d77eaad39c578ff52403d450.docx]

- The mass spectrometry proteomics data concernsing A549/H1299 PA200 KO cells and TGF-b treated phLF have been deposited to the ProteomeXchange Consortium via the PRIDE partner repository with the dataset identifier PXD061729. The anti-PA200 and anti-a2 CoIP proteomics data in testes were previously deposited with the dataset identifier PXD027436.

Reviewer access details Log in to the PRIDE website using the following details:

Project accession: PXD061729

Token: JJi5I2H8yZks Alternatively, reviewer can access the dataset by logging in to the PRIDE website using the following account details: Username: reviewer_pxd061729@ebi.ac.uk Password: mb6tD9RuJUDi

- Cryo-EM data : all map (.mrc) and model (.pdb) files and their description have been deposited in the Nature Comm. system via the FigShare tool (Figshare private link: https://figshare.com/s/6a771fa9270b85dd9dba ; Figshare DOI: https://doi.org/10.6084/m9.figshare.29155379) and are currently in the process of being deposited in the Protein Data Bank (PDB).
